# Supplementary material
Source: PubMed Central journal article supplement (PMC7116770)
Supplement: EMS114616-supplement-Supplementary_Fig_1.pdf [file EMS114616-supplement-Supplementary_Fig_1.pdf]

## a PA/P3 subunit

A/WSN/1933 (H1N1) 1 M E . D F V . . . R Q C F N P M I V E L A E K A M K E Y G E D L K I E T N K F A A I C T H L E V C F M Y S D F H F I D E  
C/Johannesburg/1/1966 1 M S K T F A E I A E A F L E E A V R I A K E A V E Y G D H . . . . E R K I I Q I G I H F Q V C C M F C D . E Y L S T

A/WSN/1933 (H1N1) 57 Q G E S I V V E L G D P N A L L K H R F E I E G R D R T I A W T V I N S I C N T T G A E K P K F L P D L Y D Y K K N R  
C/Johannesburg/1/1966 56 N G S . . . . . D R F V L I E G R K R G T A V S L Q N E L C K S Y D L E P L P F L C D I F D R E E K Q

A/WSN/1933 (H1N1) 117 F I E I G V T R R E V H I Y Y L E K A N K I K S E K T H I H I F S F T G E E M A T K A D Y T L D . . . E E S R A R I K T  
C/Johannesburg/1/1966 102 F V E I G I T R K A D D S Y F Q S K F G K L . G N S C K I F V F S Y D G R . . . . . L D K N C E G P M E E Q K L R I F S

A/WSN/1933 (H1N1) 174 R I F T I R Q E M A S R G L W D S F R Q S E R G E E T I E E R F E I T G T M R K L A D Q S L E P N F S S L E N F R A Y V  
C/Johannesburg/1/1966 156 F L A T A A D F L R K E N M F N E I F L P D N E E T I E . . M K K G K F F L E L R D E S V E L P F Q T Y E Q M K D Y C

A/WSN/1933 (H1N1) 234 D G F E P N G Y . I E G K L S O M S K E V N A R I E P F L K S T P R P L R L P D G P P C S Q R S K F L L M D A L K L S .  
C/Johannesburg/1/1966 214 E K F K G N P R E L A S K V S Q M Q S N I K L P I K H Y E Q N K F R Q I R L P K G P M A P Y T H K F L M E B A W M F T K

A/WSN/1933 (H1N1) 292 I E D P S H E G E G I P L Y D A I K C M R T F F G W K E P N V V P P E K G I N P N Y . L L . . S . W K Q V L A E L Q D  
C/Johannesburg/1/1966 274 I S D P E R S R A G E I L D . . . . . F F K K G N L S A I R P K D K P L Q G K Y P I H Y K N L W N O I K A . . . A

A/WSN/1933 (H1N1) 348 I E N E E K I P R T K N M K K T S Q L K W A L G E N M A P E K V D . . . . F D D C K D V G D L K Q Y D S D E P E I R S L  
C/Johannesburg/1/1966 324 I A D . . . . . R T M V I N E N D H S E F L G G I G R A S K K I P E I S L T Q D V I T T E G L K Q S E N K L E P P R S F

A/WSN/1933 (H1N1) 404 A S W I Q N E . . F . N K A C E L T D S S W I E L D E I G E D A A P I E H I A S M R R N Y F T A E V S H C R A T E Y I M  
C/Johannesburg/1/1966 379 P R W F N A E W M W A I K D S D L T . . G W V P M A E Y P P A D N E L E D Y A E H L N K T M E G V L Q G T N C A R E M G

A/WSN/1933 (H1N1) 461 K G V Y I N T A L L N A S C A A M D D F Q L I P M I S K C R T K E G R R K . . . . . T N I Y G F I I K G R S H L R  
C/Johannesburg/1/1966 437 K C I L T V G A L M T E C R L F P G K I K V V P I Y A R S K E R K S M Q E G L P V P S E M D C I F G I C V K S K S H L N

A/WSN/1933 (H1N1) 513 N D T D V V N F V S M E F S L T P R L E P H K W E K Y C V L E V G D M L R S A I G H . . . . V S R P M F L Y V R T N  
C/Johannesburg/1/1966 497 K D D G M Y T I I T F E F S I R P N L E . . K H Q K Y T V F E A G H T T V R M K K G E S V I G R E V P L Y L Y C R T T

A/WSN/1933 (H1N1) 569 G T S K I K M K W G M E M R R C L L Q S L Q Q I E S M I E A E S S V K E K D M T K E F F E N K S E T W P V G E S P K G V  
C/Johannesburg/1/1966 555 A L S K I K N D W L S K A R R C F I T T M D T V E T I C L R E S S A K A E E N L V E K T L N . . E K Q M W I C K K N G E L

A/WSN/1933 (H1N1) 629 E E G S I G K V C R T L L A K S V F N S L Y A S P Q L E G F S A E S R K L L L I V Q A L R D N L E P G T F D L G G L Y E  
C/Johannesburg/1/1966 613 I A Q P L R E A L R V Q L V Q Q F Y F C I Y N D S Q L E G F C N E Q K K I L M A L E G D K R N K S S F G F N P E G L L E

A/WSN/1933 (H1N1) 689 A I E E C L I N D P W V L L N A S W F N S F L T H A L R . . . . .  
C/Johannesburg/1/1966 673 K I E E C L I N P M C L F M A Q R L N E L V I E A S K R G A K F F K T D

## b PB1 subunit

A/WSN/1933 (H1N1) 1 MDVNP<sup>•</sup>T<sup>•</sup>L<sup>•</sup>L<sup>•</sup>F<sup>•</sup>L<sup>•</sup>KVPAQNA<sup>•</sup>ISTT<sup>•</sup>F<sup>•</sup>P<sup>•</sup>Y<sup>•</sup>T<sup>•</sup>G<sup>•</sup>D<sup>•</sup>P<sup>•</sup>P<sup>•</sup>Y<sup>•</sup>SHGT<sup>•</sup>G<sup>•</sup>T<sup>•</sup>G<sup>•</sup>Y<sup>•</sup>T<sup>•</sup>M<sup>•</sup>D<sup>•</sup>T<sup>•</sup>V<sup>•</sup>N<sup>•</sup>R<sup>•</sup>T<sup>•</sup>H<sup>•</sup>Q<sup>•</sup>Y<sup>•</sup>SERGRWT<sup>•</sup>T<sup>•</sup>N<sup>•</sup>T<sup>•</sup>E<sup>•</sup>  
C/Johannesburg/1/1966 1 MEINP<sup>•</sup>Y<sup>•</sup>L<sup>•</sup>M<sup>•</sup>F<sup>•</sup>L<sup>•</sup>NNDV<sup>•</sup>T<sup>•</sup>SL<sup>•</sup>ISTT<sup>•</sup>F<sup>•</sup>P<sup>•</sup>Y<sup>•</sup>T<sup>•</sup>G<sup>•</sup>PP<sup>•</sup>MSHG<sup>•</sup>SS<sup>•</sup>T<sup>•</sup>K<sup>•</sup>Y<sup>•</sup>T<sup>•</sup>LE<sup>•</sup>T<sup>•</sup>I<sup>•</sup>K<sup>•</sup>R<sup>•</sup>T<sup>•</sup>Y<sup>•</sup>D<sup>•</sup>YS<sup>•</sup>RTSVEK<sup>•</sup>T<sup>•</sup>SKV<sup>•</sup>

A/WSN/1933 (H1N1) 61 TGAP<sup>•</sup>Q<sup>•</sup>LNP<sup>•</sup>IDG<sup>•</sup>. . P<sup>•</sup>L<sup>•</sup>F<sup>•</sup>ED<sup>•</sup>NE<sup>•</sup>PS<sup>•</sup>GYA<sup>•</sup>Q<sup>•</sup>TDC<sup>•</sup>V<sup>•</sup>TE<sup>•</sup>AMAF<sup>•</sup>LE<sup>•</sup>. SHP<sup>•</sup>GI<sup>•</sup>F<sup>•</sup>ETS<sup>•</sup>CL<sup>•</sup>ET<sup>•</sup>MEV<sup>•</sup>V<sup>•</sup>Q<sup>•</sup>QT<sup>•</sup>  
C/Johannesburg/1/1966 61 FNIP<sup>•</sup>RRK<sup>•</sup>FC<sup>•</sup>NC<sup>•</sup>LED<sup>•</sup>KD<sup>•</sup>EL<sup>•</sup>V<sup>•</sup>K<sup>•</sup>PT<sup>•</sup>GN<sup>•</sup>V<sup>•</sup>DISS<sup>•</sup>LE<sup>•</sup>GLA<sup>•</sup>EM<sup>•</sup>ME<sup>•</sup>K<sup>•</sup>RM<sup>•</sup>G<sup>•</sup>E<sup>•</sup>GF<sup>•</sup>PK<sup>•</sup>H<sup>•</sup>CV<sup>•</sup>ME<sup>•</sup>AE<sup>•</sup>TE<sup>•</sup>IL<sup>•</sup>KM<sup>•</sup>

A/WSN/1933 (H1N1) 118 RVDK<sup>•</sup>L<sup>•</sup>T<sup>•</sup>Q<sup>•</sup>GR<sup>•</sup>Q<sup>•</sup>T<sup>•</sup>Y<sup>•</sup>D<sup>•</sup>WT<sup>•</sup>LN<sup>•</sup>R<sup>•</sup>N<sup>•</sup>Q<sup>•</sup>PA<sup>•</sup>ATA<sup>•</sup>L<sup>•</sup>AN<sup>•</sup>T<sup>•</sup>IE<sup>•</sup>V<sup>•</sup>FR<sup>•</sup>S<sup>•</sup>N<sup>•</sup>GL<sup>•</sup>TAN<sup>•</sup>ES<sup>•</sup>GR<sup>•</sup>L<sup>•</sup>ID<sup>•</sup>F<sup>•</sup>L<sup>•</sup>K<sup>•</sup>D<sup>•</sup>V<sup>•</sup>M<sup>•</sup>ES<sup>•</sup>M<sup>•</sup>N<sup>•</sup>KE<sup>•</sup>  
C/Johannesburg/1/1966 121 HFS<sup>•</sup>R<sup>•</sup>L<sup>•</sup>T<sup>•</sup>EG<sup>•</sup>R<sup>•</sup>Q<sup>•</sup>T<sup>•</sup>Y<sup>•</sup>D<sup>•</sup>WT<sup>•</sup>SE<sup>•</sup>R<sup>•</sup>N<sup>•</sup>M<sup>•</sup>PA<sup>•</sup>ATA<sup>•</sup>L<sup>•</sup>Q<sup>•</sup>L<sup>•</sup>T<sup>•</sup>V<sup>•</sup>DA<sup>•</sup>I<sup>•</sup>K<sup>•</sup>ET<sup>•</sup>E<sup>•</sup>GP<sup>•</sup>. K<sup>•</sup>GT<sup>•</sup>T<sup>•</sup>M<sup>•</sup>L<sup>•</sup>E<sup>•</sup>Y<sup>•</sup>C<sup>•</sup>N<sup>•</sup>K<sup>•</sup>M<sup>•</sup>I<sup>•</sup>E<sup>•</sup>M<sup>•</sup>L<sup>•</sup>D<sup>•</sup>W<sup>•</sup>K

A/WSN/1933 (H1N1) 178 EME<sup>•</sup>I<sup>•</sup>T<sup>•</sup>H<sup>•</sup>F<sup>•</sup>Q<sup>•</sup>R<sup>•</sup>K<sup>•</sup>RR<sup>•</sup>V<sup>•</sup>R<sup>•</sup>D<sup>•</sup>N<sup>•</sup>M<sup>•</sup>T<sup>•</sup>K<sup>•</sup>M<sup>•</sup>V<sup>•</sup>T<sup>•</sup>Q<sup>•</sup>R<sup>•</sup>T<sup>•</sup>I<sup>•</sup>G<sup>•</sup>K<sup>•</sup>R<sup>•</sup>K<sup>•</sup>Q<sup>•</sup>R<sup>•</sup>L<sup>•</sup>N<sup>•</sup>K<sup>•</sup>R<sup>•</sup>S<sup>•</sup>Y<sup>•</sup>L<sup>•</sup>I<sup>•</sup>R<sup>•</sup>A<sup>•</sup>L<sup>•</sup>T<sup>•</sup>L<sup>•</sup>N<sup>•</sup>T<sup>•</sup>M<sup>•</sup>T<sup>•</sup>K<sup>•</sup>D<sup>•</sup>A<sup>•</sup>E<sup>•</sup>R<sup>•</sup>G<sup>•</sup>K<sup>•</sup>L<sup>•</sup>K<sup>•</sup>  
C/Johannesburg/1/1966 180 EIK<sup>•</sup>FK<sup>•</sup>K<sup>•</sup>V<sup>•</sup>K<sup>•</sup>T<sup>•</sup>V<sup>•</sup>V<sup>•</sup>RR<sup>•</sup>E<sup>•</sup>K<sup>•</sup>D<sup>•</sup>K<sup>•</sup>R<sup>•</sup>S<sup>•</sup>G<sup>•</sup>KE<sup>•</sup>L<sup>•</sup>K<sup>•</sup>T<sup>•</sup>K<sup>•</sup>V<sup>•</sup>P<sup>•</sup>V<sup>•</sup>M<sup>•</sup>G<sup>•</sup>I<sup>•</sup>D<sup>•</sup>S<sup>•</sup>IK<sup>•</sup>H<sup>•</sup>D<sup>•</sup>E<sup>•</sup>F<sup>•</sup>L<sup>•</sup>I<sup>•</sup>R<sup>•</sup>A<sup>•</sup>L<sup>•</sup>T<sup>•</sup>L<sup>•</sup>N<sup>•</sup>T<sup>•</sup>M<sup>•</sup>A<sup>•</sup>K<sup>•</sup>D<sup>•</sup>G<sup>•</sup>E<sup>•</sup>R<sup>•</sup>G<sup>•</sup>K<sup>•</sup>L<sup>•</sup>Q

A/WSN/1933 (H1N1) 238 RRAI<sup>•</sup>AT<sup>•</sup>PG<sup>•</sup>M<sup>•</sup>Q<sup>•</sup>IR<sup>•</sup>GF<sup>•</sup>V<sup>•</sup>Y<sup>•</sup>F<sup>•</sup>V<sup>•</sup>ET<sup>•</sup>LA<sup>•</sup>RS<sup>•</sup>ICE<sup>•</sup>KL<sup>•</sup>E<sup>•</sup>Q<sup>•</sup>SGL<sup>•</sup>P<sup>•</sup>V<sup>•</sup>GG<sup>•</sup>NE<sup>•</sup>KK<sup>•</sup>AK<sup>•</sup>L<sup>•</sup>AN<sup>•</sup>V<sup>•</sup>R<sup>•</sup>K<sup>•</sup>M<sup>•</sup>M<sup>•</sup>T<sup>•</sup>NS<sup>•</sup>Q<sup>•</sup>D<sup>•</sup>TE<sup>•</sup>  
C/Johannesburg/1/1966 240 RRAI<sup>•</sup>AT<sup>•</sup>PG<sup>•</sup>M<sup>•</sup>IV<sup>•</sup>RP<sup>•</sup>FS<sup>•</sup>K<sup>•</sup>IV<sup>•</sup>ET<sup>•</sup>VA<sup>•</sup>Q<sup>•</sup>K<sup>•</sup>ICE<sup>•</sup>KL<sup>•</sup>KE<sup>•</sup>SGL<sup>•</sup>P<sup>•</sup>V<sup>•</sup>GG<sup>•</sup>NE<sup>•</sup>KK<sup>•</sup>AK<sup>•</sup>L<sup>•</sup>KT<sup>•</sup>TV<sup>•</sup>TS<sup>•</sup>LN<sup>•</sup>ARM<sup>•</sup>NS<sup>•</sup>D<sup>•</sup>Q

A/WSN/1933 (H1N1) 298 ISFT<sup>•</sup>IT<sup>•</sup>GD<sup>•</sup>NT<sup>•</sup>K<sup>•</sup>W<sup>•</sup>NE<sup>•</sup>N<sup>•</sup>Q<sup>•</sup>N<sup>•</sup>P<sup>•</sup>RM<sup>•</sup>F<sup>•</sup>L<sup>•</sup>AM<sup>•</sup>ITY<sup>•</sup>Y<sup>•</sup>IT<sup>•</sup>R<sup>•</sup>N<sup>•</sup>Q<sup>•</sup>PE<sup>•</sup>W<sup>•</sup>FR<sup>•</sup>N<sup>•</sup>V<sup>•</sup>L<sup>•</sup>SI<sup>•</sup>AP<sup>•</sup>IM<sup>•</sup>ES<sup>•</sup>N<sup>•</sup>K<sup>•</sup>M<sup>•</sup>AR<sup>•</sup>L<sup>•</sup>G<sup>•</sup>K<sup>•</sup>G<sup>•</sup>Y<sup>•</sup>MF<sup>•</sup>  
C/Johannesburg/1/1966 300 FAV<sup>•</sup>NI<sup>•</sup>T<sup>•</sup>GD<sup>•</sup>NS<sup>•</sup>SK<sup>•</sup>W<sup>•</sup>NE<sup>•</sup>C<sup>•</sup>Q<sup>•</sup>PE<sup>•</sup>AV<sup>•</sup>LA<sup>•</sup>L<sup>•</sup>L<sup>•</sup>AY<sup>•</sup>IT<sup>•</sup>K<sup>•</sup>DS<sup>•</sup>SD<sup>•</sup>LM<sup>•</sup>K<sup>•</sup>D<sup>•</sup>LC<sup>•</sup>SV<sup>•</sup>AP<sup>•</sup>VE<sup>•</sup>ES<sup>•</sup>C<sup>•</sup>N<sup>•</sup>K<sup>•</sup>F<sup>•</sup>V<sup>•</sup>RL<sup>•</sup>GG<sup>•</sup>Q<sup>•</sup>IR<sup>•</sup>L

A/WSN/1933 (H1N1) 358 ESK<sup>•</sup>SM<sup>•</sup>K<sup>•</sup>L<sup>•</sup>R<sup>•</sup>T<sup>•</sup>Q<sup>•</sup>IP<sup>•</sup>AE<sup>•</sup>ML<sup>•</sup>AS<sup>•</sup>ID<sup>•</sup>L<sup>•</sup>K<sup>•</sup>Y<sup>•</sup>FN<sup>•</sup>D<sup>•</sup>ST<sup>•</sup>R<sup>•</sup>KK<sup>•</sup>IE<sup>•</sup>E<sup>•</sup>K<sup>•</sup>IR<sup>•</sup>P<sup>•</sup>L<sup>•</sup>L<sup>•</sup>ID<sup>•</sup>GT<sup>•</sup>AS<sup>•</sup>LS<sup>•</sup>EG<sup>•</sup>MM<sup>•</sup>MG<sup>•</sup>MF<sup>•</sup>N<sup>•</sup>M<sup>•</sup>LS<sup>•</sup>T<sup>•</sup>  
C/Johannesburg/1/1966 360 SN<sup>•</sup>K<sup>•</sup>R<sup>•</sup>KT<sup>•</sup>KE<sup>•</sup>VI<sup>•</sup>IK<sup>•</sup>AE<sup>•</sup>K<sup>•</sup>M<sup>•</sup>G<sup>•</sup>K<sup>•</sup>Y<sup>•</sup>. N<sup>•</sup>LM<sup>•</sup>RE<sup>•</sup>E<sup>•</sup>Y<sup>•</sup>K<sup>•</sup>N<sup>•</sup>LF<sup>•</sup>E<sup>•</sup>PLE<sup>•</sup>K<sup>•</sup>Y<sup>•</sup>I<sup>•</sup>Q<sup>•</sup>K<sup>•</sup>D<sup>•</sup>V<sup>•</sup>CF<sup>•</sup>LP<sup>•</sup>GG<sup>•</sup>ML<sup>•</sup>MG<sup>•</sup>MF<sup>•</sup>N<sup>•</sup>M<sup>•</sup>LS<sup>•</sup>T<sup>•</sup>

A/WSN/1933 (H1N1) 418 VLG<sup>•</sup>VS<sup>•</sup>I<sup>•</sup>TL<sup>•</sup>N<sup>•</sup>L<sup>•</sup>G<sup>•</sup>Q<sup>•</sup>R<sup>•</sup>H<sup>•</sup>T<sup>•</sup>K<sup>•</sup>T<sup>•</sup>TY<sup>•</sup>W<sup>•</sup>WD<sup>•</sup>GL<sup>•</sup>Q<sup>•</sup>SS<sup>•</sup>DD<sup>•</sup>F<sup>•</sup>AL<sup>•</sup>IV<sup>•</sup>NA<sup>•</sup>P<sup>•</sup>N<sup>•</sup>HE<sup>•</sup>G<sup>•</sup>I<sup>•</sup>Q<sup>•</sup>AG<sup>•</sup>V<sup>•</sup>N<sup>•</sup>RF<sup>•</sup>Y<sup>•</sup>RT<sup>•</sup>CK<sup>•</sup>L<sup>•</sup>L<sup>•</sup>GIN<sup>•</sup>M<sup>•</sup>  
C/Johannesburg/1/1966 419 VLG<sup>•</sup>VS<sup>•</sup>T<sup>•</sup>LC<sup>•</sup>Y<sup>•</sup>M<sup>•</sup>DE<sup>•</sup>EL<sup>•</sup>K<sup>•</sup>AK<sup>•</sup>G<sup>•</sup>CF<sup>•</sup>WT<sup>•</sup>GL<sup>•</sup>Q<sup>•</sup>SS<sup>•</sup>DD<sup>•</sup>F<sup>•</sup>VL<sup>•</sup>FA<sup>•</sup>VA<sup>•</sup>SN<sup>•</sup>WS<sup>•</sup>NI<sup>•</sup>H<sup>•</sup>WT<sup>•</sup>IR<sup>•</sup>RF<sup>•</sup>NAV<sup>•</sup>CK<sup>•</sup>L<sup>•</sup>L<sup>•</sup>GIN<sup>•</sup>M<sup>•</sup>

A/WSN/1933 (H1N1) 478 SKK<sup>•</sup>K<sup>•</sup>S<sup>•</sup>Y<sup>•</sup>I<sup>•</sup>N<sup>•</sup>R<sup>•</sup>T<sup>•</sup>GT<sup>•</sup>FE<sup>•</sup>FT<sup>•</sup>S<sup>•</sup>FF<sup>•</sup>Y<sup>•</sup>R<sup>•</sup>Y<sup>•</sup>G<sup>•</sup>F<sup>•</sup>V<sup>•</sup>AN<sup>•</sup>FS<sup>•</sup>M<sup>•</sup>EL<sup>•</sup>P<sup>•</sup>S<sup>•</sup>F<sup>•</sup>GV<sup>•</sup>S<sup>•</sup>C<sup>•</sup>I<sup>•</sup>NE<sup>•</sup>S<sup>•</sup>AD<sup>•</sup>MS<sup>•</sup>I<sup>•</sup>G<sup>•</sup>V<sup>•</sup>T<sup>•</sup>V<sup>•</sup>I<sup>•</sup>K<sup>•</sup>N<sup>•</sup>M<sup>•</sup>IN<sup>•</sup>N<sup>•</sup>  
C/Johannesburg/1/1966 479 SLE<sup>•</sup>K<sup>•</sup>S<sup>•</sup>Y<sup>•</sup>G<sup>•</sup>S<sup>•</sup>L<sup>•</sup>PE<sup>•</sup>L<sup>•</sup>FE<sup>•</sup>FT<sup>•</sup>S<sup>•</sup>MF<sup>•</sup>F<sup>•</sup>D<sup>•</sup>GE<sup>•</sup>F<sup>•</sup>V<sup>•</sup>SN<sup>•</sup>LA<sup>•</sup>M<sup>•</sup>EL<sup>•</sup>P<sup>•</sup>AF<sup>•</sup>TT<sup>•</sup>AG<sup>•</sup>V<sup>•</sup>NE<sup>•</sup>GV<sup>•</sup>DF<sup>•</sup>TA<sup>•</sup>AM<sup>•</sup>SI<sup>•</sup>IK<sup>•</sup>T<sup>•</sup>N<sup>•</sup>M<sup>•</sup>IN<sup>•</sup>N<sup>•</sup>

A/WSN/1933 (H1N1) 538 DLG<sup>•</sup>PA<sup>•</sup>T<sup>•</sup>A<sup>•</sup>Q<sup>•</sup>M<sup>•</sup>AL<sup>•</sup>Q<sup>•</sup>L<sup>•</sup>F<sup>•</sup>IK<sup>•</sup>D<sup>•</sup>Y<sup>•</sup>R<sup>•</sup>Y<sup>•</sup>TY<sup>•</sup>R<sup>•</sup>GH<sup>•</sup>R<sup>•</sup>G<sup>•</sup>D<sup>•</sup>T<sup>•</sup>Q<sup>•</sup>I<sup>•</sup>Q<sup>•</sup>T<sup>•</sup>RR<sup>•</sup>S<sup>•</sup>FE<sup>•</sup>TK<sup>•</sup>KL<sup>•</sup>WE<sup>•</sup>Q<sup>•</sup>TH<sup>•</sup>SK<sup>•</sup>AG<sup>•</sup>LL<sup>•</sup>V<sup>•</sup>SD<sup>•</sup>GG<sup>•</sup>PN<sup>•</sup>  
C/Johannesburg/1/1966 539 SLS<sup>•</sup>PS<sup>•</sup>T<sup>•</sup>AL<sup>•</sup>M<sup>•</sup>AL<sup>•</sup>RI<sup>•</sup>CL<sup>•</sup>Q<sup>•</sup>E<sup>•</sup>FR<sup>•</sup>AT<sup>•</sup>Y<sup>•</sup>R<sup>•</sup>VP<sup>•</sup>W<sup>•</sup>DS<sup>•</sup>RV<sup>•</sup>K<sup>•</sup>GG<sup>•</sup>RM<sup>•</sup>K<sup>•</sup>IN<sup>•</sup>EF<sup>•</sup>IK<sup>•</sup>T<sup>•</sup>IE<sup>•</sup>N<sup>•</sup>K<sup>•</sup>D<sup>•</sup>GL<sup>•</sup>L<sup>•</sup>L<sup>•</sup>AD<sup>•</sup>GG<sup>•</sup>KL

A/WSN/1933 (H1N1) 598 LY<sup>•</sup>NI<sup>•</sup>R<sup>•</sup>N<sup>•</sup>L<sup>•</sup>HI<sup>•</sup>PE<sup>•</sup>V<sup>•</sup>CL<sup>•</sup>KE<sup>•</sup>EL<sup>•</sup>M<sup>•</sup>DE<sup>•</sup>Y<sup>•</sup>Q<sup>•</sup>GR<sup>•</sup>LC<sup>•</sup>NP<sup>•</sup>L<sup>•</sup>NP<sup>•</sup>FF<sup>•</sup>V<sup>•</sup>N<sup>•</sup>H<sup>•</sup>K<sup>•</sup>D<sup>•</sup>IES<sup>•</sup>V<sup>•</sup>NN<sup>•</sup>AV<sup>•</sup>IMP<sup>•</sup>A<sup>•</sup>H<sup>•</sup>GP<sup>•</sup>AK<sup>•</sup>N<sup>•</sup>ME<sup>•</sup>Y<sup>•</sup>  
C/Johannesburg/1/1966 599 MN<sup>•</sup>NI<sup>•</sup>ST<sup>•</sup>L<sup>•</sup>HI<sup>•</sup>PE<sup>•</sup>EV<sup>•</sup>L<sup>•</sup>KE<sup>•</sup>E<sup>•</sup>K<sup>•</sup>M<sup>•</sup>DE<sup>•</sup>Q<sup>•</sup>Y<sup>•</sup>R<sup>•</sup>NR<sup>•</sup>RV<sup>•</sup>FN<sup>•</sup>PN<sup>•</sup>PF<sup>•</sup>T<sup>•</sup>N<sup>•</sup>FD<sup>•</sup>KT<sup>•</sup>. . . . ID<sup>•</sup>TF<sup>•</sup>RA<sup>•</sup>H<sup>•</sup>GP<sup>•</sup>IR<sup>•</sup>VE<sup>•</sup>EN

A/WSN/1933 (H1N1) 658 DAV<sup>•</sup>AT<sup>•</sup>TH<sup>•</sup>SW<sup>•</sup>IP<sup>•</sup>K<sup>•</sup>R<sup>•</sup>NR<sup>•</sup>S<sup>•</sup>I<sup>•</sup>L<sup>•</sup>NT<sup>•</sup>SO<sup>•</sup>R<sup>•</sup>G<sup>•</sup>I<sup>•</sup>LE<sup>•</sup>EQ<sup>•</sup>Y<sup>•</sup>Q<sup>•</sup>K<sup>•</sup>C<sup>•</sup>NI<sup>•</sup>E<sup>•</sup>E<sup>•</sup>K<sup>•</sup>FF<sup>•</sup>PS<sup>•</sup>SS<sup>•</sup>Y<sup>•</sup>RR<sup>•</sup>P<sup>•</sup>V<sup>•</sup>GI<sup>•</sup>SS<sup>•</sup>M<sup>•</sup>VE<sup>•</sup>EA<sup>•</sup>  
C/Johannesburg/1/1966 654 EAV<sup>•</sup>VS<sup>•</sup>TH<sup>•</sup>S<sup>•</sup>FR<sup>•</sup>TR<sup>•</sup>AN<sup>•</sup>RT<sup>•</sup>L<sup>•</sup>NT<sup>•</sup>DM<sup>•</sup>RAM<sup>•</sup>MA<sup>•</sup>E<sup>•</sup>E<sup>•</sup>K<sup>•</sup>RY<sup>•</sup>Q<sup>•</sup>M<sup>•</sup>V<sup>•</sup>CD<sup>•</sup>ME<sup>•</sup>K<sup>•</sup>SV<sup>•</sup>FE<sup>•</sup>S<sup>•</sup>AD<sup>•</sup>IN<sup>•</sup>PP<sup>•</sup>IG<sup>•</sup>AM<sup>•</sup>SI<sup>•</sup>GE<sup>•</sup>A

A/WSN/1933 (H1N1) 718 MVS<sup>•</sup>R<sup>•</sup>AR<sup>•</sup>ID<sup>•</sup>AR<sup>•</sup>ID<sup>•</sup>F<sup>•</sup>ES<sup>•</sup>GR<sup>•</sup>IK<sup>•</sup>KE<sup>•</sup>E<sup>•</sup>FT<sup>•</sup>E<sup>•</sup>IM<sup>•</sup>K<sup>•</sup>IC<sup>•</sup>ST<sup>•</sup>IE<sup>•</sup>EL<sup>•</sup>RR<sup>•</sup>Q<sup>•</sup>K<sup>•</sup>.  
C/Johannesburg/1/1966 714 IEE<sup>•</sup>K<sup>•</sup>LLER<sup>•</sup>AK<sup>•</sup>M<sup>•</sup>K<sup>•</sup>R<sup>•</sup>D<sup>•</sup>IG<sup>•</sup>AL<sup>•</sup>IED<sup>•</sup>SE<sup>•</sup>YE<sup>•</sup>E<sup>•</sup>IK<sup>•</sup>D<sup>•</sup>I<sup>•</sup>IRD<sup>•</sup>AK<sup>•</sup>K<sup>•</sup>AR<sup>•</sup>LES<sup>•</sup>R

### c PB2 subunit

|                       |     |                                                                                                                           |
|-----------------------|-----|---------------------------------------------------------------------------------------------------------------------------|
| A/WSN/1933 (H1N1)     | 1   | . . . . M E R I K E L R N L M S Q S R T R E I L T K T T V D H M A I I K K Y T S G R Q E K N P A L R M K W M M A M K Y P   |
| C/Johannesburg/1/1966 | 1   | M S L L L T I A K E Y K R L C Q D A K A A Q M M T V G T V S N Y T T F K K W T S R K E K N P S L R M R W A M S S K F P     |
| A/WSN/1933 (H1N1)     | 57  | T T A D K R I T E M I P E . R N E Q G Q T L W S K M N D A G . S D R V M V S P L A V T W W N R N G P V T S T V . H Y P K   |
| C/Johannesburg/1/1966 | 61  | T I A N K R M L E E A Q I P K E H N N V A L W E D T E D V S K R D H V L A S A S C I N Y W N F C G P C V N N S E V I K E   |
| A/WSN/1933 (H1N1)     | 114 | I Y K T Y F E K V E R L K H G T F G P V H F R N Q V K I R R R V D I N P G H A D L S A K E A Q D V I M E V V F P N E V G   |
| C/Johannesburg/1/1966 | 121 | V Y K S R F G R L E R R K E I M W K E L R F T L V D R Q R R R V D T Q P V E Q R L R T G E I K D L Q M W T L E D E A P     |
| A/WSN/1933 (H1N1)     | 174 | A R I L T S E S Q L T T T K E K K E E L Q G C K I S P L M V A Y M L I E R E L V R K T R F L P V A G G T S S V Y I E V L H |
| C/Johannesburg/1/1966 | 181 | L A S K F I L D N Y G L V K E M R S K F A N K P L N K E V V A H M L E K Q F N P E S R F L P V F G A I R P E R M E L I H   |
| A/WSN/1933 (H1N1)     | 234 | L T Q G T C W E Q M Y T P G C E A R N D D V D Q S L I I A A R N I V R R A T V S A . D P L A S T L E M C H S T . . Q I G   |
| C/Johannesburg/1/1966 | 241 | A L G E T W T Q E A N T A G I S N V D Q R K N D I R A V C R K V C L A A N A S I M N A K S K L V E Y I K S T S M R I G     |
| A/WSN/1933 (H1N1)     | 291 | G . . I R M V N I L R Q N P T E E Q A V D I C K A M G L R I S S S F S F G G T F K R T S G S S V K R E E E V L T G N       |
| C/Johannesburg/1/1966 | 301 | E T E R K L E E L I L E T D D V S P E V T I C K S A L G G Q L G K T L S F G P M L L K K I S G S G V K V K D T V Y I Q G   |
| A/WSN/1933 (H1N1)     | 349 | L Q T L K I R V H E G Y E E F T M V G R R A T A I L R K A T R R L I Q L I V S G R D E Q S I A E A I I V A M V F S Q E D   |
| C/Johannesburg/1/1966 | 361 | V R A V Q F E Y W S E Q E E F Y G E Y K S A T A L F S R K B R S L E W I T I G G I N E D R K R L L A M C M F C R D G       |
| A/WSN/1933 (H1N1)     | 409 | C M I K A V R G D L N F V N R A N Q R L N P M H Q L L R H F Q K . . D A K V L F Q N W G I E S I D N V M G M I . . . G I   |
| C/Johannesburg/1/1966 | 421 | D Y F K D A P A T I T M A D . . . . . L S T K L G R E I P Y Q Y V M M N W I Q K S E D N L E A L L Y S R G I               |
| A/WSN/1933 (H1N1)     | 464 | L . . . P D M T . . . . . P S T E M S M R G V R I S K M G V D E Y S S A E K I V V S I D R F L R V R D Q R G N V           |
| C/Johannesburg/1/1966 | 470 | V E T N P G K M G S S M G I D G S K R A I K S I L R A V T I Q S G K I D M P E S K E K I H L E L S D N L E A F D S S G R I |
| A/WSN/1933 (H1N1)     | 512 | L L S P E E V S E T Q G T E K L T I T Y S S S M M W E I N G P E S V L V N T Y Q W I I R N W E T V K . . . . I Q W S Q     |
| C/Johannesburg/1/1966 | 530 | V A T I L D L P S D K K V T F Q D V S F Q H P D L A V L R D E K T A I T K G Y E A L I K R L G T G D N D I P S L I A K K   |
| A/WSN/1933 (H1N1)     | 567 | N P T M L Y N K M E F E P F Q S I V P K A V R G C Y S G F V R T I F Q Q M R D V L G T F D T A Q I I K L L P F A A A P P   |
| C/Johannesburg/1/1966 | 590 | D Y L S L Y N L P E V K L M A P I I R P N R R G V Y S R V A R K L V S . T Q V T T G H Y S L H E L I K V L P F T Y F A P   |
| A/WSN/1933 (H1N1)     | 627 | K Q S G M Q F S S L T I N V R G S G M R I L V R G N S P V F N Y N K T T K R L T . V L G K D . A G P L T E D P D E G T A   |
| C/Johannesburg/1/1966 | 649 | K Q G M F E G R L F F S N D . . . . F V E P G V N N N V F S W S K A D S S K I Y C H G I A I R V P L V V . . G D E H M     |
| A/WSN/1933 (H1N1)     | 685 | G V E S A V L R G F L I L G K E D R R Y G P A L S I N E L S N L A K G E K A N V L I G Q G D V V L V M K R K R N S S I L   |
| C/Johannesburg/1/1966 | 703 | D T S L A L L E G F S V C E N D . . P R A P M V T R Q D L I D V G F G Q K V R L F V G Q G S V R T F K R T A S Q R A S     |
| A/WSN/1933 (H1N1)     | 745 | T D S Q T A T K R I R M A I N                                                                                             |
| C/Johannesburg/1/1966 | 761 | S D V N K N V K K I K M S N .                                                                                             |

**Supplementary Fig. 1 Sequence alignment of FluPol<sub>A</sub> and FluPol<sub>C</sub>. a - c, Sequence alignment of FluPol subunits (a, PA/P3; b, PB1; c, PB2) from influenza A/WSN/33 (H1N1) and C/Johannesburg/1/1966 viruses. Residues involved in forming the asymmetric FluPol dimer interface are highlighted in cyan, and residues involved in ANP32A binding are highlighted in orange. The figure was prepared with Espright 3.0<sup>60</sup>.**
