# Supplementary material
Source: PubMed Central journal article supplement (PMC7116770)

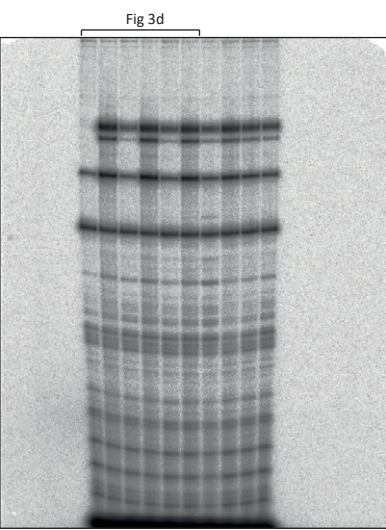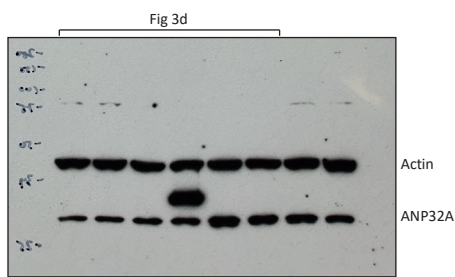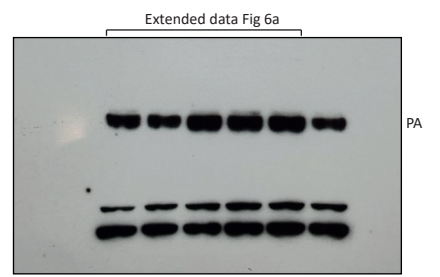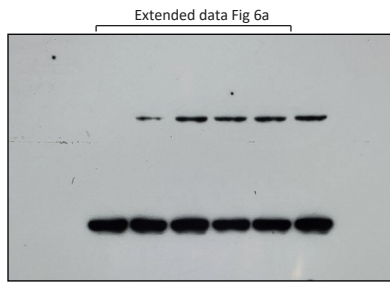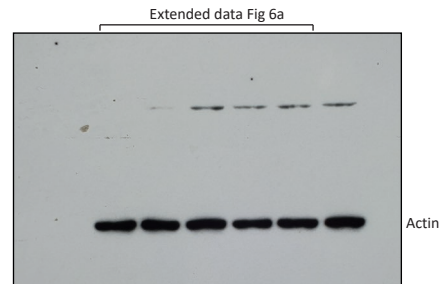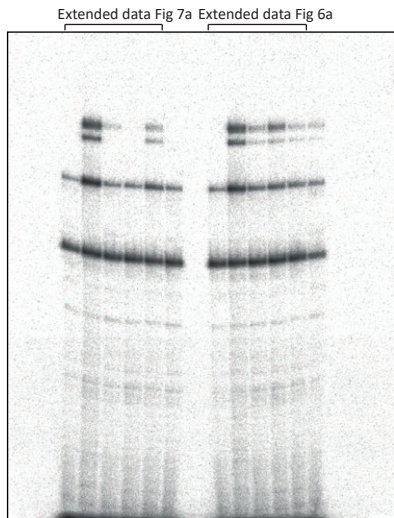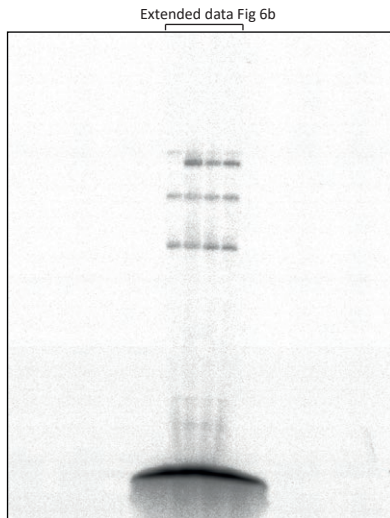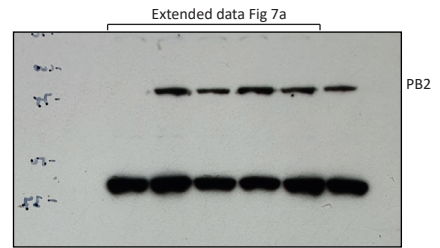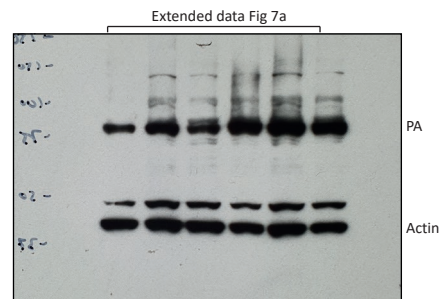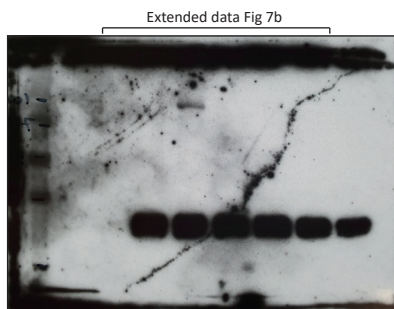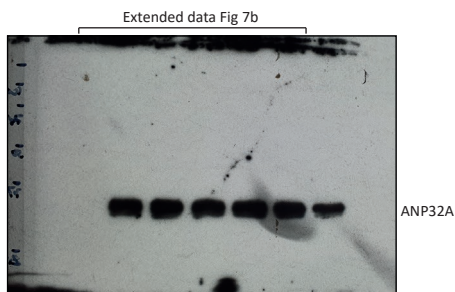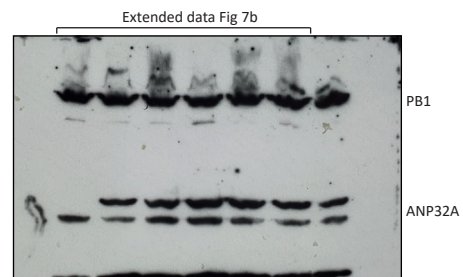

Supplement: EMS114616-supplement-Supplementary_Fig_2.pdf [file EMS114616-supplement-Supplementary_Fig_2.pdf]
